# Supplementary material for: A Two-Step Femtosecond Laser-Based Deposition of Robust Corrosion-Resistant Molybdenum Oxide Coating
Source: Materials (Basel). 2023 Jan 18;16(3):909. doi: 10.3390/ma16030909 (PMC9918068; doi:10.3390/ma16030909)
Supplement: Supplementary file 1 [file materials-16-00909-s001.zip › materials-2036473-supplementary.pdf]

# Supplementary Information

## A two-step femtosecond laser-based deposition of robust corrosion-resistant molybdenum oxide coatings

Asghar Ali<sup>a,b</sup>, Piotr A. Piatkowski<sup>b</sup>, Tahir Nawaz<sup>b</sup>, Shahbaz Ahmad<sup>b</sup>, Taleb Ibrahim<sup>b,c</sup>, Mustafa Khamis<sup>b,d</sup>, and Ali S. Alnaser<sup>a, b,\*</sup>

<sup>a</sup>Department of Physics, American University of Sharjah, Sharjah 26666, United Arab Emirates

<sup>b</sup>Materials Science and Engineering Program, College of Arts and Sciences, American University of Sharjah, Sharjah 26666, United Arab Emirates

<sup>c</sup>Department of Chemical Engineering, College of Engineering, American University of Sharjah, Sharjah 26666, United Arab Emirates

<sup>d</sup>Department of Biology, Chemistry, and Environmental Sciences, College of Arts and Sciences, American University of Sharjah, Sharjah 26666, United Arab Emirates

\*Email: aalnaser@aus.edu

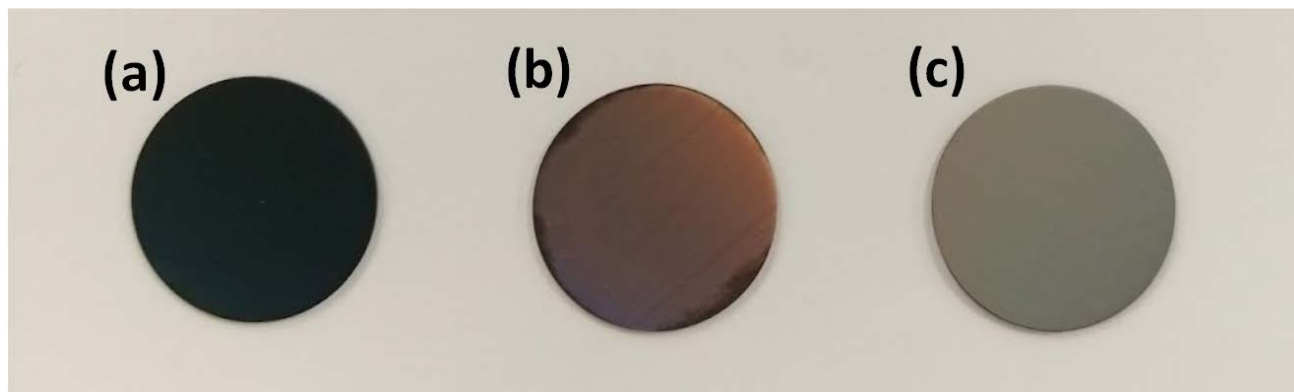

Figure S1. Camera captured images of the (a) as-deposited Mo over mild steel obtained via fs-PLD at  $0.5 \text{ J/cm}^2$  fluence, 240 fs pulse duration, and 150 kHz repetition rate (Mo/MS) (b) sample obtained after scanning Mo/MS with 40 fs and 50 kHz pulses of  $1.5 \text{ J/cm}^2$  fluence (Mo-1.5/MS) (c) sample obtained after scanning Mo-1.5/MS surface with 40 fs and 50 kHz pulses of fluence  $0.2 \text{ J/cm}^2$

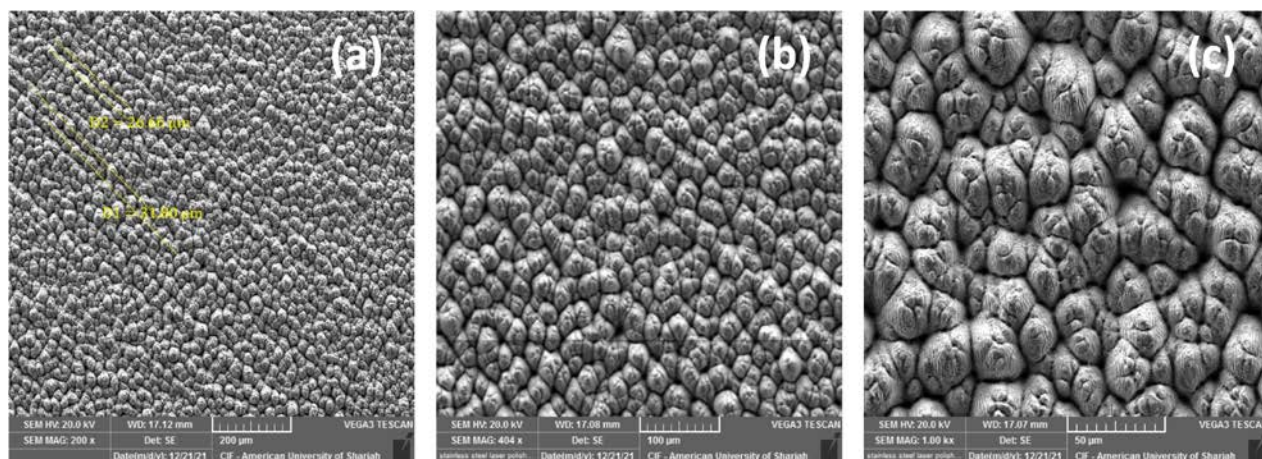

Figure S2. Morphology at (a) 200 x, (b) 404 x, and (c) 1 kx after of mild steel after laser-scanned with 40 fs and 50 kHz pulses of fluence  $1.5 \text{ J/cm}^2$ , followed by  $0.2 \text{ J/cm}^2$

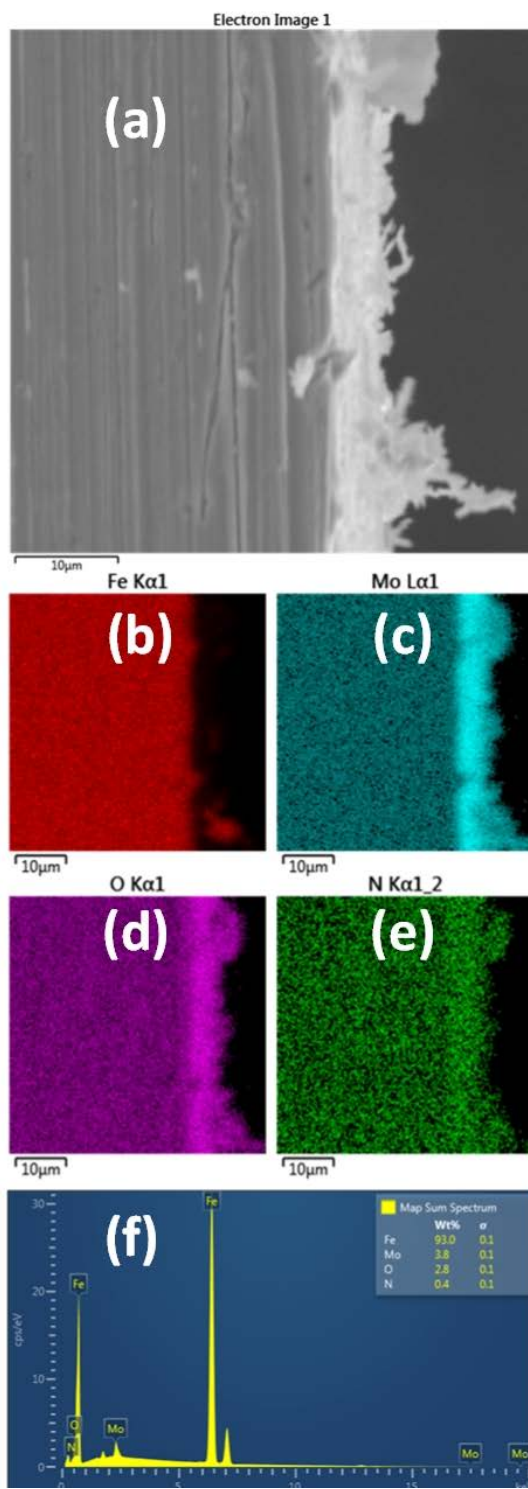

Figure S3. EDS analysis of the cross section of the as deposited Mo over mild steel

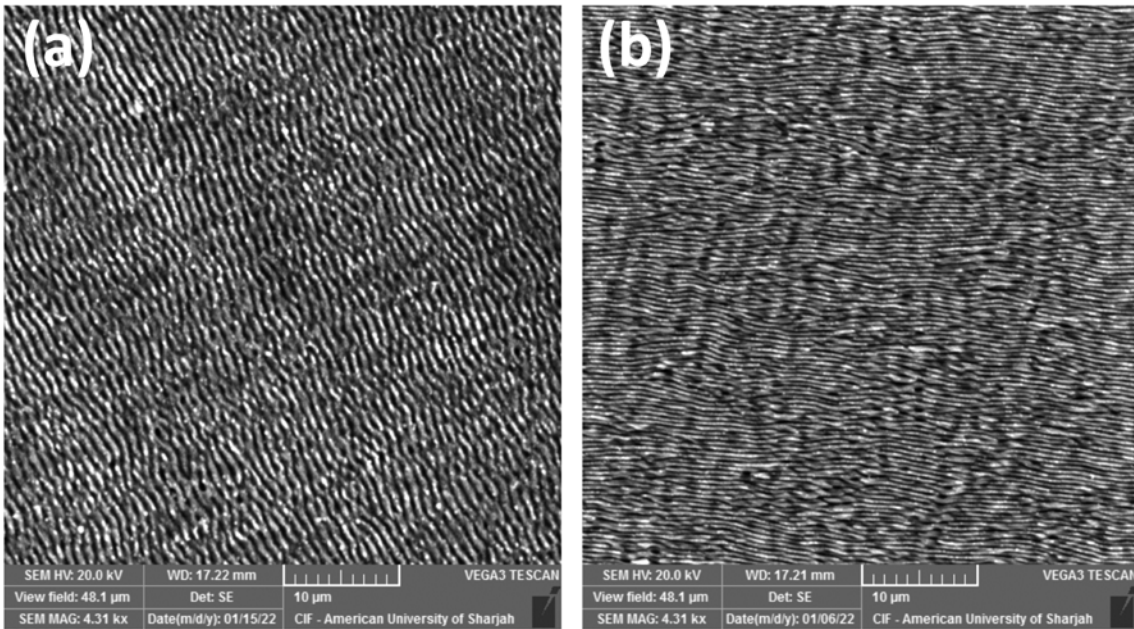

Figure S4. SEM micrographs of (a) Mo-1.5/MS and (b) MoO<sub>x</sub>/MS with a view field of 48.1  $\mu\text{m}$  for 2D FFT analysis

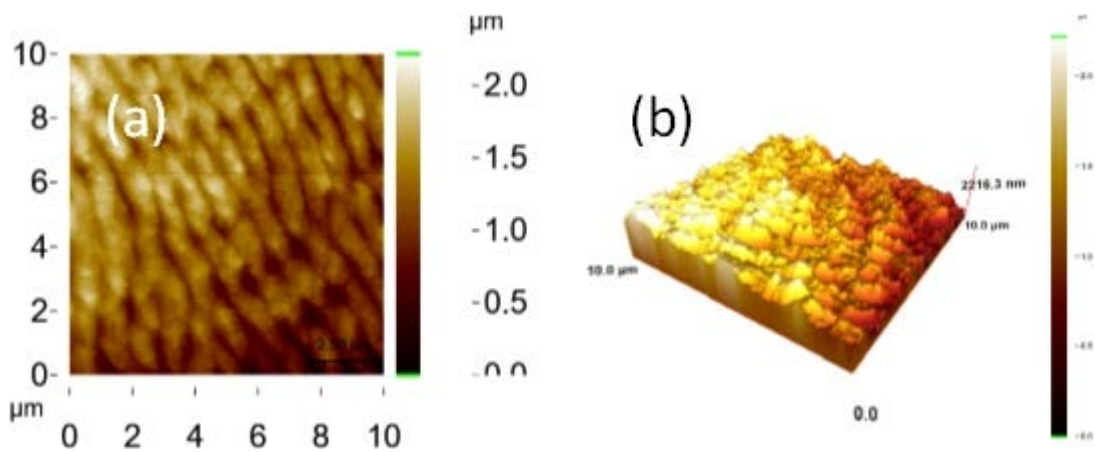

Figure S5. AFM topography of Mo/MS (a) top view (b) 3D profile

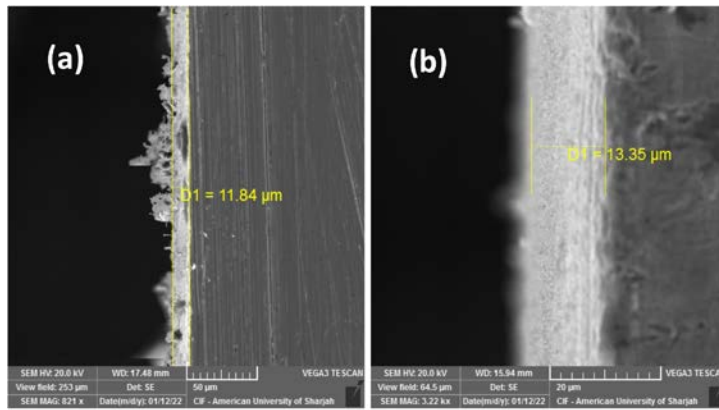

Figure S6. Cross sectional SEM micrograph of the as-deposited Mo/MS acquired at (a) 821 x and (b) 3.22 kx magnifications

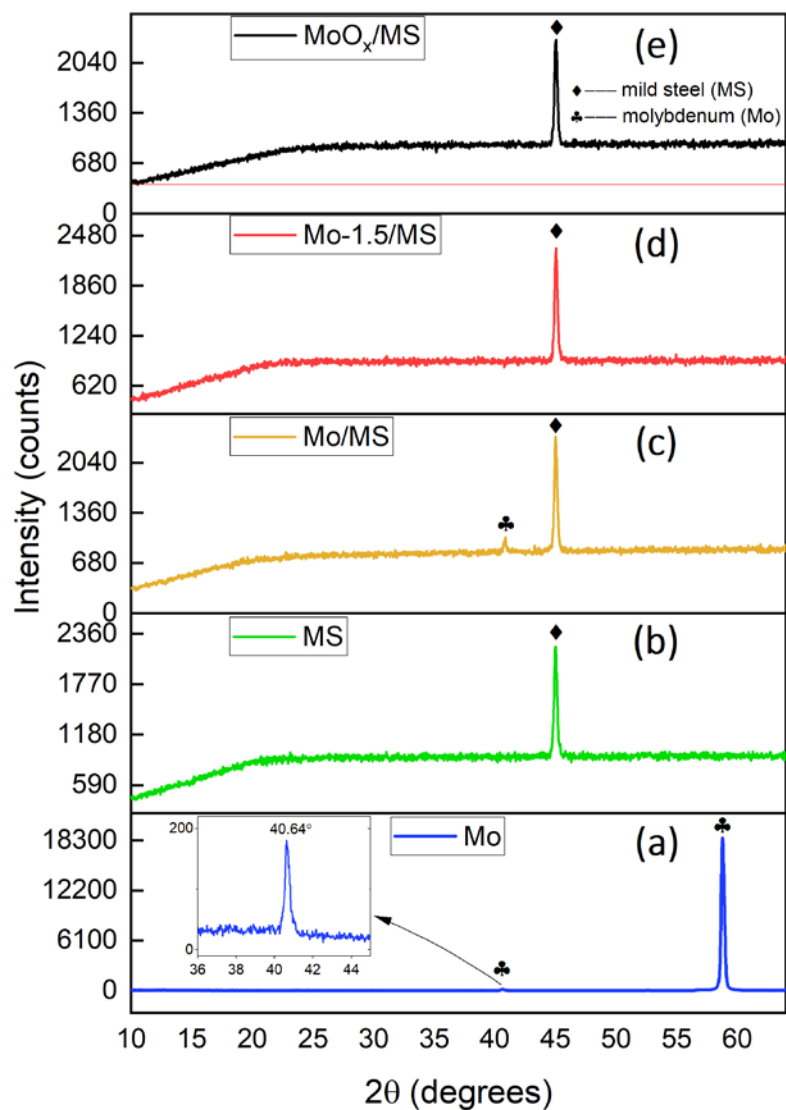

Figure S7. X-ray diffraction analysis of **(a)** the source molybdenum foil (Mo), **(b)** mild steel (MS), **(c)** as deposited molybdenum over mild steel (Mo/MS), and molybdenum oxide coating over mild steel after laser-scanning Mo/MS with fluence of **(d)**  $1.5 \text{ J/cm}^2$ , followed by **(e)**  $0.2 \text{ J/cm}^2$

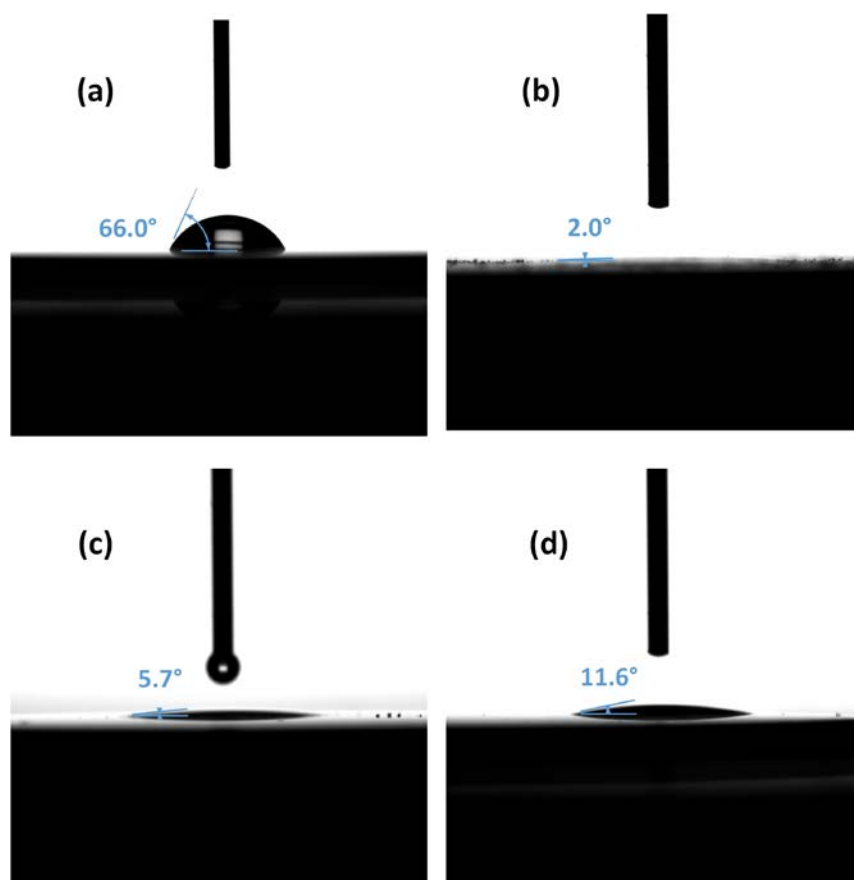

Figure S8. Contact angle measurements of (a) polished mild steel (MS), (b) as deposited Mo (Mo/MS), (c) 1.5 J/cm<sup>2</sup> laser-scanned (Mo-1.5/MS) and (d) 0.2 J/cm<sup>2</sup> laser-scanned after 1.5 J/cm<sup>2</sup> treatment in air (MoO<sub>x</sub>/MS)
